# Supplementary material
Source: publisher figshare collection journal article supplement (https://future-science-group.figshare.com/ndownloader/files/34719532)
Supplement: Supplementary file 1 [file 34719532]

**Supplementary Figure S4. PFS, Relative Effects, Observational Studies and Clinical Trials (Forest Plot)**


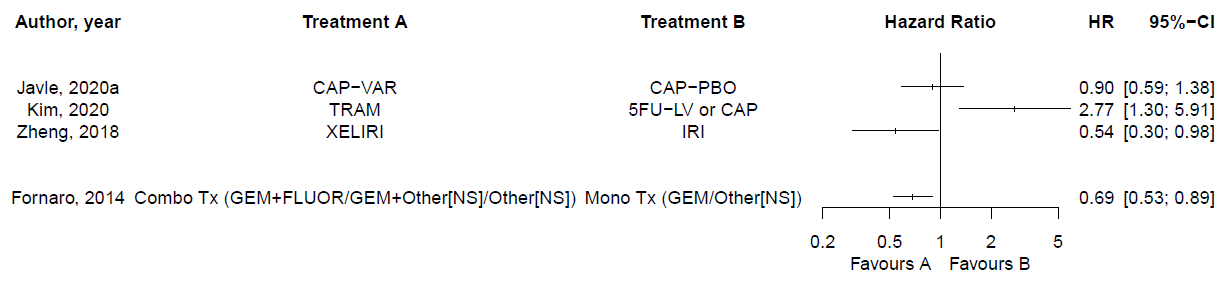


**Observational | Clinical Trials**

*Median rather than mean age reported; “-“ or “+” indicates that combination treatment was received (eg, CAP-PBO, capecitabine plus placebo, CAP+CIS, capecitabine plus cisplatin). “±” indicates that a treatment was received either in combination with the next listed treatment or as a monotherapy (eg, FLUOR±PLT, fluoropyrimidine with or without a platinum). “/” indicates that either treatment listed was received (eg, GEM+CIS/S1, gemcitabine plus cisplatin *or* S1).
